# Supplementary material
Source: Research Square preprint supplement (doi:10.21203/rs.3.rs-9468934/v1)
Supplement: Supplementary file 1 [file 8af5ba020392fe2830682f24.docx]

Supplementary information to

**Estuarine water levels diverge from nearshore trends**

Rosey Harta*, Ben S. Hagueb, Michael Hughesa,c, William Glamored, Neda Sharifi Soltania, Danial Khojasteha,e*

a Science and Insights Division, NSW Department of Climate Change, Energy, the Environment and Water, Sydney, NSW, Australia

b Bureau of Meteorology, Melbourne, VIC, Australia

c School of Earth, Atmospheric and Life Sciences, University of Wollongong, North Wollongong, NSW, Australia

d Water Research Laboratory, School of Civil and Environmental Engineering, UNSW, Sydney, NSW, Australia

e Centre for Marine Science and Innovation, School of Biological, Earth and Environmental Science, UNSW Sydney, NSW, Australia

* Corresponding authors:

R. Hart ([rosey.hart@dcceew.nsw.gov.au](mailto:rosey.hart@dcceew.nsw.gov.au))

D. Khojasteh ([danial.khojasteh@dcceew.nsw.gov.au](mailto:danial.khojasteh@dcceew.nsw.gov.au))

This file includes:

Supplementary Tables:

**Table S1:** Rates of change in nearshore water levels.

**Table S2:** Rates of change in estuarine water levels.

**Table S3:** Characteristics of analysed estuaries.

Supplementary Figures

**Figure S1:** Comparison of rates of change in estuarine water levels.

**Figure S2:** Locations of analysed estuaries and water level gauges along the NSW coastline.

**Figure S3:** Water level time series showing flood events at Grafton and Taree stations.

**Table S1 – Rates of change in nearshore water levels.**

Summary of measured rates of change in low (5th percentile), mean (50th percentile), and high (95th percentile) water levels from nearshore tide gauges used to characterise ocean conditions for the period 2005–2024 (inclusive). Rates of change were calculated using linear regression (refer to Methods for details), and only statistically significant trends (ρ ≤ 0.05) are presented. Gauges are ordered from north to south along the New South Wales coastline (latitude shown in decimal degrees).

| **Gauge Name** | **Latitude**  *(degrees)* | **Rate of Change** (mm year-1) | | |
| --- | --- | --- | --- | --- |
| **Low Water Level**  (5th percentile) | **Mean Water Level**  (50th percentile) | **High Water Level**  (95th percentile) |
| Tweed Entrance South | -28.17 | 4.22 | 3.47 | 2.67 |
| Yamba | -29.43 | 4.6 | 3.84 | 3.75 |
| Coffs Harbour | -30.3 | 6.48 | 6.3 | 6.44 |
| Port Macquarie | -31.43 | 1.95 | 2.41 | 2.88 |
| Crowdy Head | -31.84 | 5.24 | 4.73 | 4.06 |
| Forster | -32.18 | 7.16 | 6.1 | 6.16 |
| Patonga | -33.55 | 5.66 | 6.05 | 6.12 |
| Port Kembla | -34.47 | 4.64 | 4.99 | 4.71 |
| Jervis Bay | -35.12 | 6.15 | 5.5 | 4.55 |
| Bermagui | -36.42 | 4.11 | 4.12 | 4.09 |
| Eden | -37.07 | 4.51 | 4.13 | 3.02 |

**Table S2 – Rates of change in estuarine water levels.**

Summary of measured rates of change in low (5th percentile), mean (50th percentile), and high (95th percentile) water levels for all gauges located within the analysed estuaries. Rates of change were calculated using linear regression applied to monthly water level percentiles over the period 2005–2024 (inclusive). Estuaries are ordered from north to south along the New South Wales coastline, with gauges listed by increasing distance from the estuary entrance. Gauges located within the main stem of each estuary are indicated in bold.

| **Estuary** | **Gauge name** | **Distance from entrance**  *(km)* | **Rate of change** *(mm year-1)* | | |
| --- | --- | --- | --- | --- | --- |
| **Low water level**  *(5th percentile)* | **Mean water level** *(50th percentile)* | **High water level** *(95th percentile)* |
| Tweed River | Dry Dock | 6.1 | 3.8 | 5.06 | 6.48 |
| **Barneys Point** | 7.5 | 3.13 | 4.77 | 7.21 |
| Cobaki | 9.1 | 2.95 | 4.32 | 5.91 |
| Terranora | 9.4 | 3.23 | 4.13 | 5.85 |
| **North Murwillumbah** | 30.1 | ρ≥0.05 | 4.28 | 7.19 |
| **Murwillumbah Bridge** | 30.3 | -2.59 | ρ≥0.05 | 4.69 |
| Cudgen Creek | **Kingscliff** | 0.3 | 10.74 | 9.56 | 8.84 |
| **Bogangar** | 11.9 | 5.65 | 5.40 | ρ≥0.05 |
| Brunswick River | **Brunswick Heads** | 0.6 | 5.38 | 5.17 | 5.08 |
| Orana Bridge | 3.9 | ρ≥0.05 | 2.54 | 3.31 |
| Billinudgel | 9.5 | 1.59 | 2.5 | 3.5 |
| **Mullumbimby** | 11.6 | ρ≥0.05 | 2.26 | 2.01 |
| Richmond River | **Byrnes Point** | 6.7 | 5.23 | 6.22 | 7.48 |
| **Wardell** | 18.3 | ρ≥0.05 | ρ≥0.05 | ρ≥0.05 |
| **Woodburn** | 42.7 | 5.32 | 5.59 | 6.7 |
| **Rocky Mouth Creek** | 46.3 | 4.368 | 2.94 | ρ≥0.05 |
| **Bungawalbin** | 55.4 | 9.76 | 9.42 | 9.5 |
| **Coraki** | 63.5 | 3.81 | 3.71 | 3.92 |
| Clarence River | **Yamba** | 0.9 | 4.6 | 4.09 | 3.91 |
| Oyster Channel | 7.8 | 3.86 | 3.54 | 4.62 |
| Palmers Island Bridge | 17.1 | 2.47 | 2.86 | 3.39 |
| **Maclean** | 25.1 | 4.61 | 4.35 | 5.25 |
| **Lawrence** | 36.9 | 3.77 | 3.31 | 3.92 |
| Tyndale | 42.3 | 3.56 | 2.68 | 2.74 |
| **Grafton** | 67.7 | 7.99 | 8.43 | 8.85 |
| **Rogans Bridge** | 91.3 | 4.82 | 4.35 | 6.64 |
| Boambee Creek | **Boambee Entrance** | 0.8 | ρ≥0.05 | 3.21 | 5.98 |
| **Boambee** | 5.7 | ρ≥0.05 | ρ≥0.05 | 3.43 |
| Newports Creek | 6.1 | 1.43 | 3.3 | 5.9 |
| Bellinger River | Urunga | 2. | 3.67 | 4.42 | 5.15 |
| **Repton** | 7.8 | 4.35 | 3.61 | 3.72 |
| Nambucca River | **Stuarts Island** | 2.9 | ρ≥0.05 | 2.43 | 5.65 |
| Utungun | 23.1 | 1.94 | 2.73 | 6.6 |
| Macleay River | **South West Rocks** | 2.3 | 2.56 | 4.39 | 4.56 |
| **Smithtown** | 24.1 | 2.66 | 3.24 | 3.92 |
| **Kempsey** | 41.5 | ρ≥0.05 | 2.2 | 7.58 |
| Hastings River | **Port Macquarie** | 0.6 | 1.95 | 2.58 | 3.1 |
| **Settlement Point** | 3.4 | 5.85 | 6.42 | 6.69 |
| **Dennis Bridge Downstream** | 13 | ρ≥0.05 | ρ≥0.05 | ρ≥0.05 |
| **Wauchope Railway Bridge** | 26.1 | 4.37 | 5.35 | 5.43 |
| Telegraph Point | 30.9 | 2.99 | 3.82 | 4.9 |
| Camden Haven | **North Haven** | 1.5 | 1.59 | 2.5 | 3.5 |
| West Haven | 5.7 | ρ≥0.05 | 2.26 | 2.01 |
| **Watson Taylor Lake** | 13.8 | 5.38 | 5.17 | 5.08 |
| Manning River | **Harrington** | 1 | 3 | 4.02 | 11.12 |
| **Croki** | 13 | -5.64 | ρ≥0.05 | 7.04 |
| **Dumaresq Island** | 22.7 | -5.49 | ρ≥0.05 | 6.54 |
| **Taree** | 28.8 | -5.62 | ρ≥0.05 | 9.78 |
| **Wingham** | 47.4 | ρ≥0.05 | ρ≥0.05 | 9.39 |
| Hunter River | **Stockton Bridge** | 6.8 | 7.43 | 6.85 | 5.51 |
| **Hexham Bridge** | 20.5 | 6.92 | 5.75 | 4.36 |
| **Raymond Terrace** | 32.4 | 6.64 | 4.68 | 2.68 |
| **Green Rocks** | 40.9 | 7.16 | 5.66 | 4.17 |
| Seaham | 47.1 | 5.5 | 3.74 | 1.92 |
| Hinton Bridge | 48.6 | 4.70 | 4.93 | 5.14 |
| **Morpeth** | 49.3 | 3 | 2.8 | 3.13 |
| Dunmore | 55.6 | 3.5 | 4.01 | 4.86 |
| Wallis Creek Downstream | 56.7 | -3.31 | ρ≥0.05 | 2.84 |
| **Belmore Bridge** | 58.9 | 4.73 | 5.85 | 5.6 |
| **Paterson Railway Bridge** | 70.1 | ρ≥0.05 | ρ≥0.05 | ρ≥0.05 |
| Brisbane Water | **Ettalong** | 4.6 | 3.99 | 3.91 | 4.07 |
| **Koolewong** | 12 | 3.09 | 3.44 | 4 |
| **Punt Bridge** | 16.6 | 4.13 | 4.29 | 4.74 |
| Hawkesbury River | **Patonga** | 6 | 5.66 | 6.08 | 6.14 |
| **Spencer** | 31.5 | 3.91 | 4.78 | 5.35 |
| **Gunderman Caravan Park** | 47.9 | 5.74 | 5.67 | 5.24 |
| **Webbs Creek** | 60.5 | 8.8 | 8.41 | 7.06 |
| **Colo Junction** | 78.8 | 8.46 | 6.04 | 4.17 |
| **Sackville** | 94.1 | 10.55 | 7.83 | 5.3 |
| **Ebenezer** | 108.6 | 9.42 | 7.31 | 2.69 |
| **Windsor** | 122.7 | 10.05 | 6.87 | ρ≥0.05 |
| **Freemans Reach** | 13 | -5.55 | 2.91 | 15.25 |
| Botany Bay | Tempe Bridge | 2.9 | 4.01 | 4.3 | 4.36 |
| Canterbury Road | 8.6 | -1.47 | 5.46 | 4.67 |
| **Como Bridge** | 9.1 | 4.28 | 5.19 | 6 |
| **Picnic Point Downstream** | 19.9 | 3.78 | 4.77 | 4.72 |
| Lansdowne Bridge | 34.9 | 4.06 | 5.27 | 5.45 |
| Irelands Bridge | 37.7 | 3.81 | 4.44 | 5.11 |
| **Scrivener Street** | 39.1 | 3.46 | 4.05 | 4.69 |
| Shoalhaven River | **Crookhaven Heads** | 1.1 | 5.89 | 5.72 | 5.46 |
| **Greenwell Point** | 3.2 | 6.1 | 5.47 | 4.56 |
| **Hay Street** | 10 | 3.58 | 5.59 | 7.41 |
| Shoalhaven Heads | 11.8 | 3.94 | 5.46 | 6.73 |
| **Terara** | 17.6 | 2.85 | 6.08 | 10 |
| **Nowra Bridge** | 19.6 | ρ≥0.05 | 3.53 | 7.70 |

**Table S3 – Characteristics of analysed estuaries.**

Summary of key physical and geomorphic characteristics of the estuaries analysed in this study, including estuary type according to Roy (1984), catchment area (DCCEEW, 2011), entrance width, present-day tidal limit, and entrance condition (trained or natural). Entrance width is measured at the most seaward constriction of the estuary mouth using aerial imagery. Estuaries are ordered from north to south along the New South Wales coastline.

| **Estuary** | | **Type / Classification** | **Catchment Size**  *(km2)* | **Entrance Width**  *(m)* | **Tidal Limit**  *(km)* | **Entrance conditions** |
| --- | --- | --- | --- | --- | --- | --- |
| Tweed River | | Barrier estuary | 1077.5 | 180 | 42.0 | Training walls (2) |
| Cudgen Creek | | Brackish barrier lake | 70.8 | 55 | 13.7 | Training walls (2) |
| Brunswick River | | Barrier estuary | 229.9 | 80 | 14.0 | Training walls (2) |
| Richmond River | | Barrier estuary | 6900.2 | 350 | 115.5 | Training walls (2) |
| Clarence River | | Barrier estuary | 22187.4 | 360 | 109.5 | Training walls (2) |
| Boambee Creek | | Barrier estuary | 49.5 | 85 | 8.2 | Natural |
| Bellinger River | | Barrier estuary | 1108.5 | 220 | 26.1 | Single training wall |
| Nambucca River | | Barrier estuary | 1311.6 | 500 | 31.8 | Single training wall |
| Macleay River | | Barrier estuary | 11318.7 | 210 | 56.7 | Training walls (2) |
| Hastings River | | Barrier estuary | 3688.5 | 205 | 42.3 | Training walls (2) |
| Camden Haven River | | Barrier estuary | 621.1 | 145 | 25.9 | Training walls (2) |
| Manning River | | Barrier estuary | 8159.2 | 1980 | 53.9 | Single training wall |
| Hunter River | | Barrier estuary | 21414.0 | 500 | 74.2 | Training walls (2) |
| Brisbane Water | | Barrier estuary | 180.9 | 390 | 24.0 | Natural |
| Hawkesbury River | | Drowned valley estuary | 21738.5 | 3890 | 138.5 | Natural |
| Botany Bay | Cooks River | Drowned valley estuary | 111.8 | 121 | 13.0 | Training walls (2) |
| Georges River | Drowned valley estuary | 957.5 | 1000 | 39.9 | Natural |
| Shoalhaven River | | Barrier estuary | 7117.7 | 470 | 50.2 | Single training wall |

**
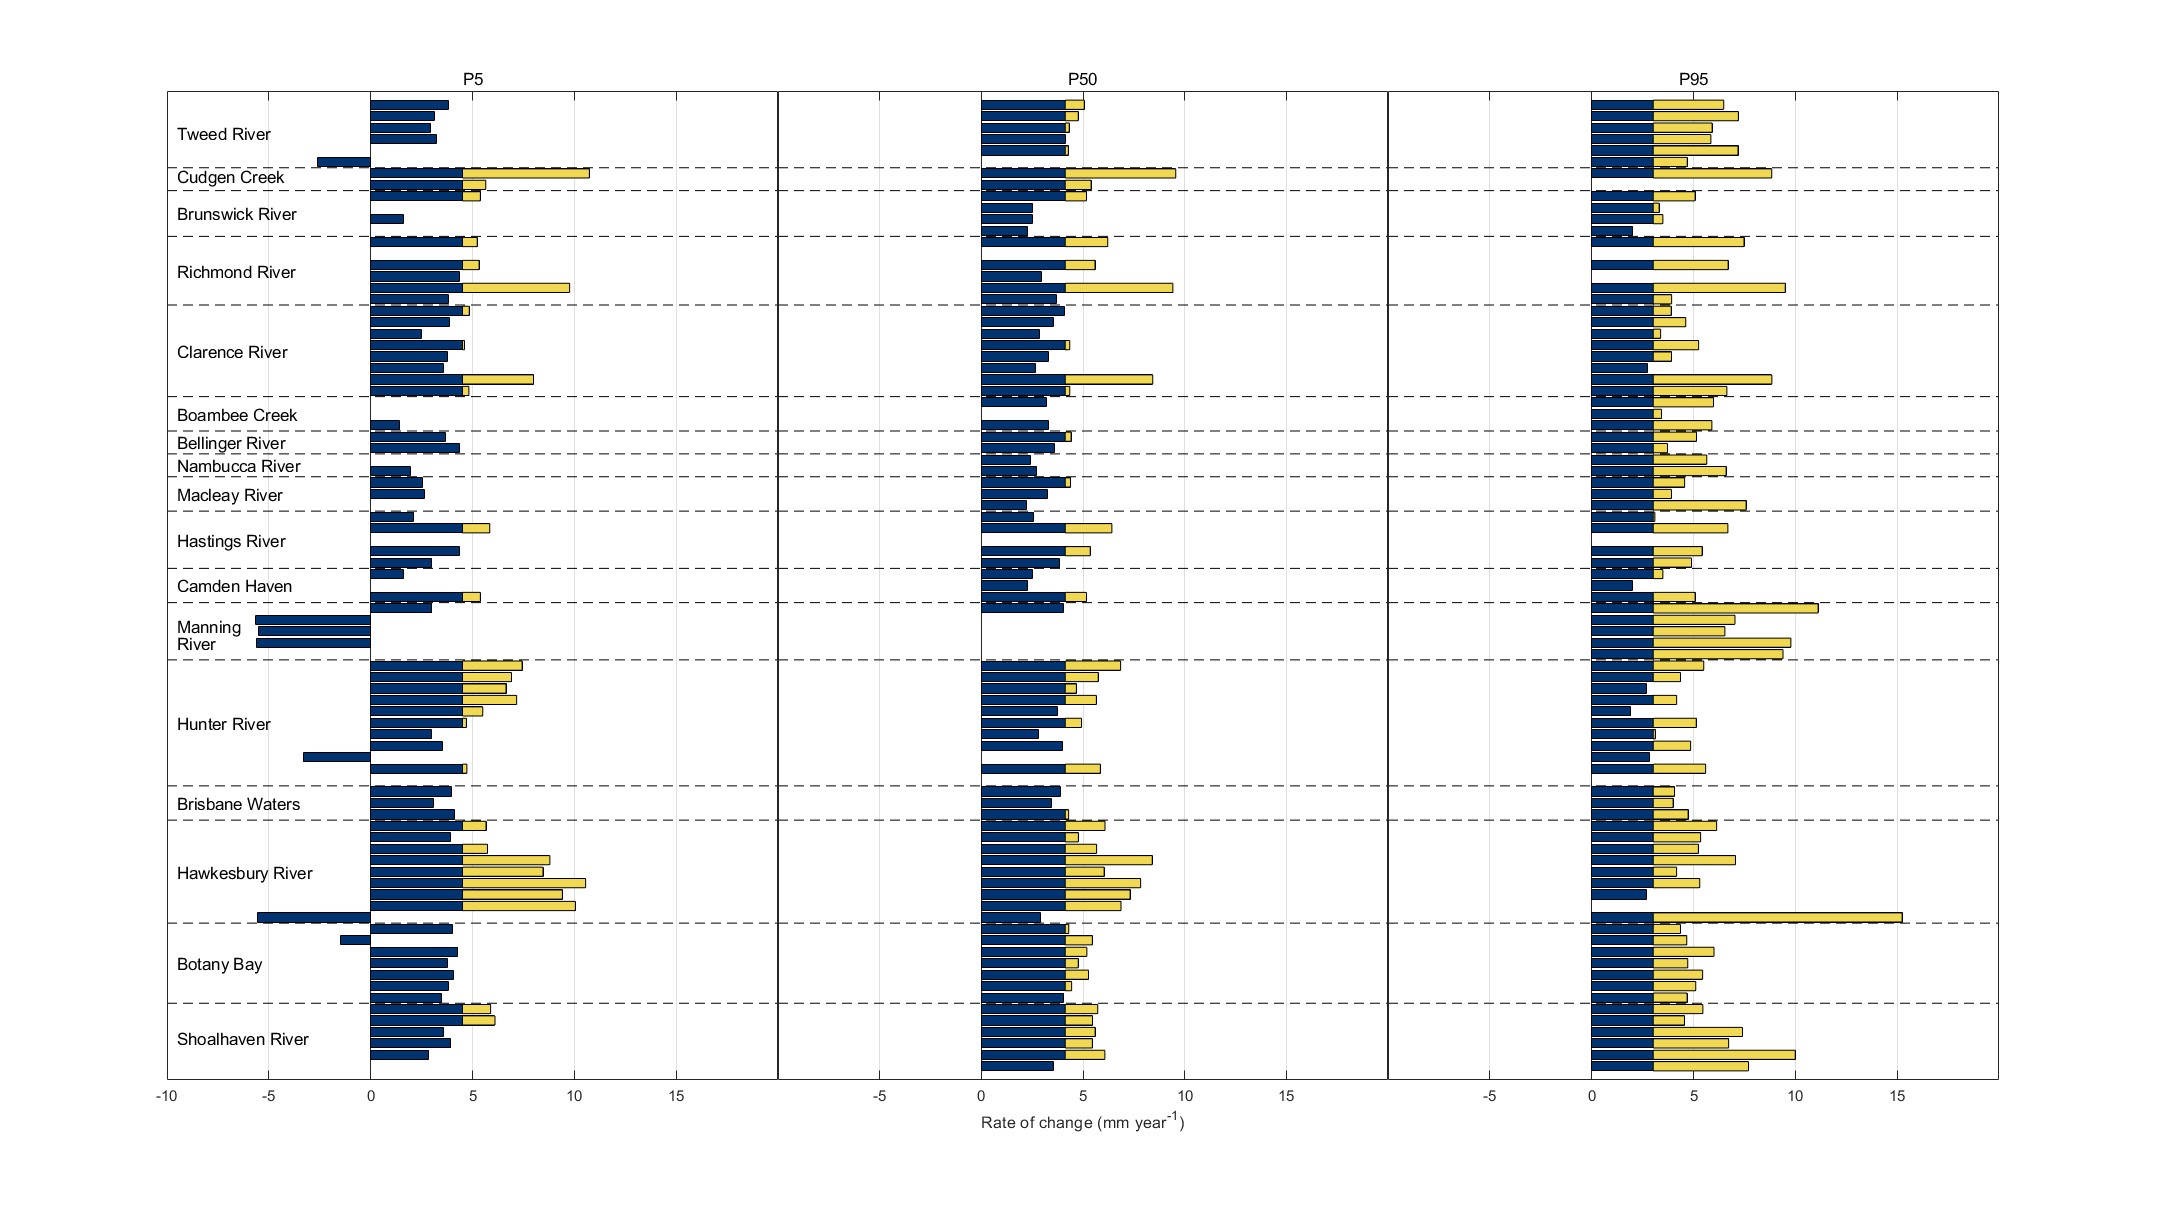
**

**Figure S1 – Comparison of rates of change in estuarine water levels for gauges within all tributaries.**

Rates of change in estuarine water levels for low (5th percentile; P5, left column), mean (50th percentile; P50, middle column), and high (95th percentile; P95, right column) calculated using linear regression applied to monthly water level percentiles for the period 2005–2024 (inclusive). Estuaries are ordered from north to south. Each bar represents a gauge located along any tributary of an estuary (i.e., within the main stem or any secondary tributaries leading into the main stem), ordered from top to bottom by increasing distance from the estuary entrance. Bars shown in yellow indicate rates of change exceeding those observed offshore, using data from the Port Kembla sea level monitoring station as a proxy for nearshore conditions. Empty bars indicate gauges for which trends were not statistically significant (ρ > 0.05).


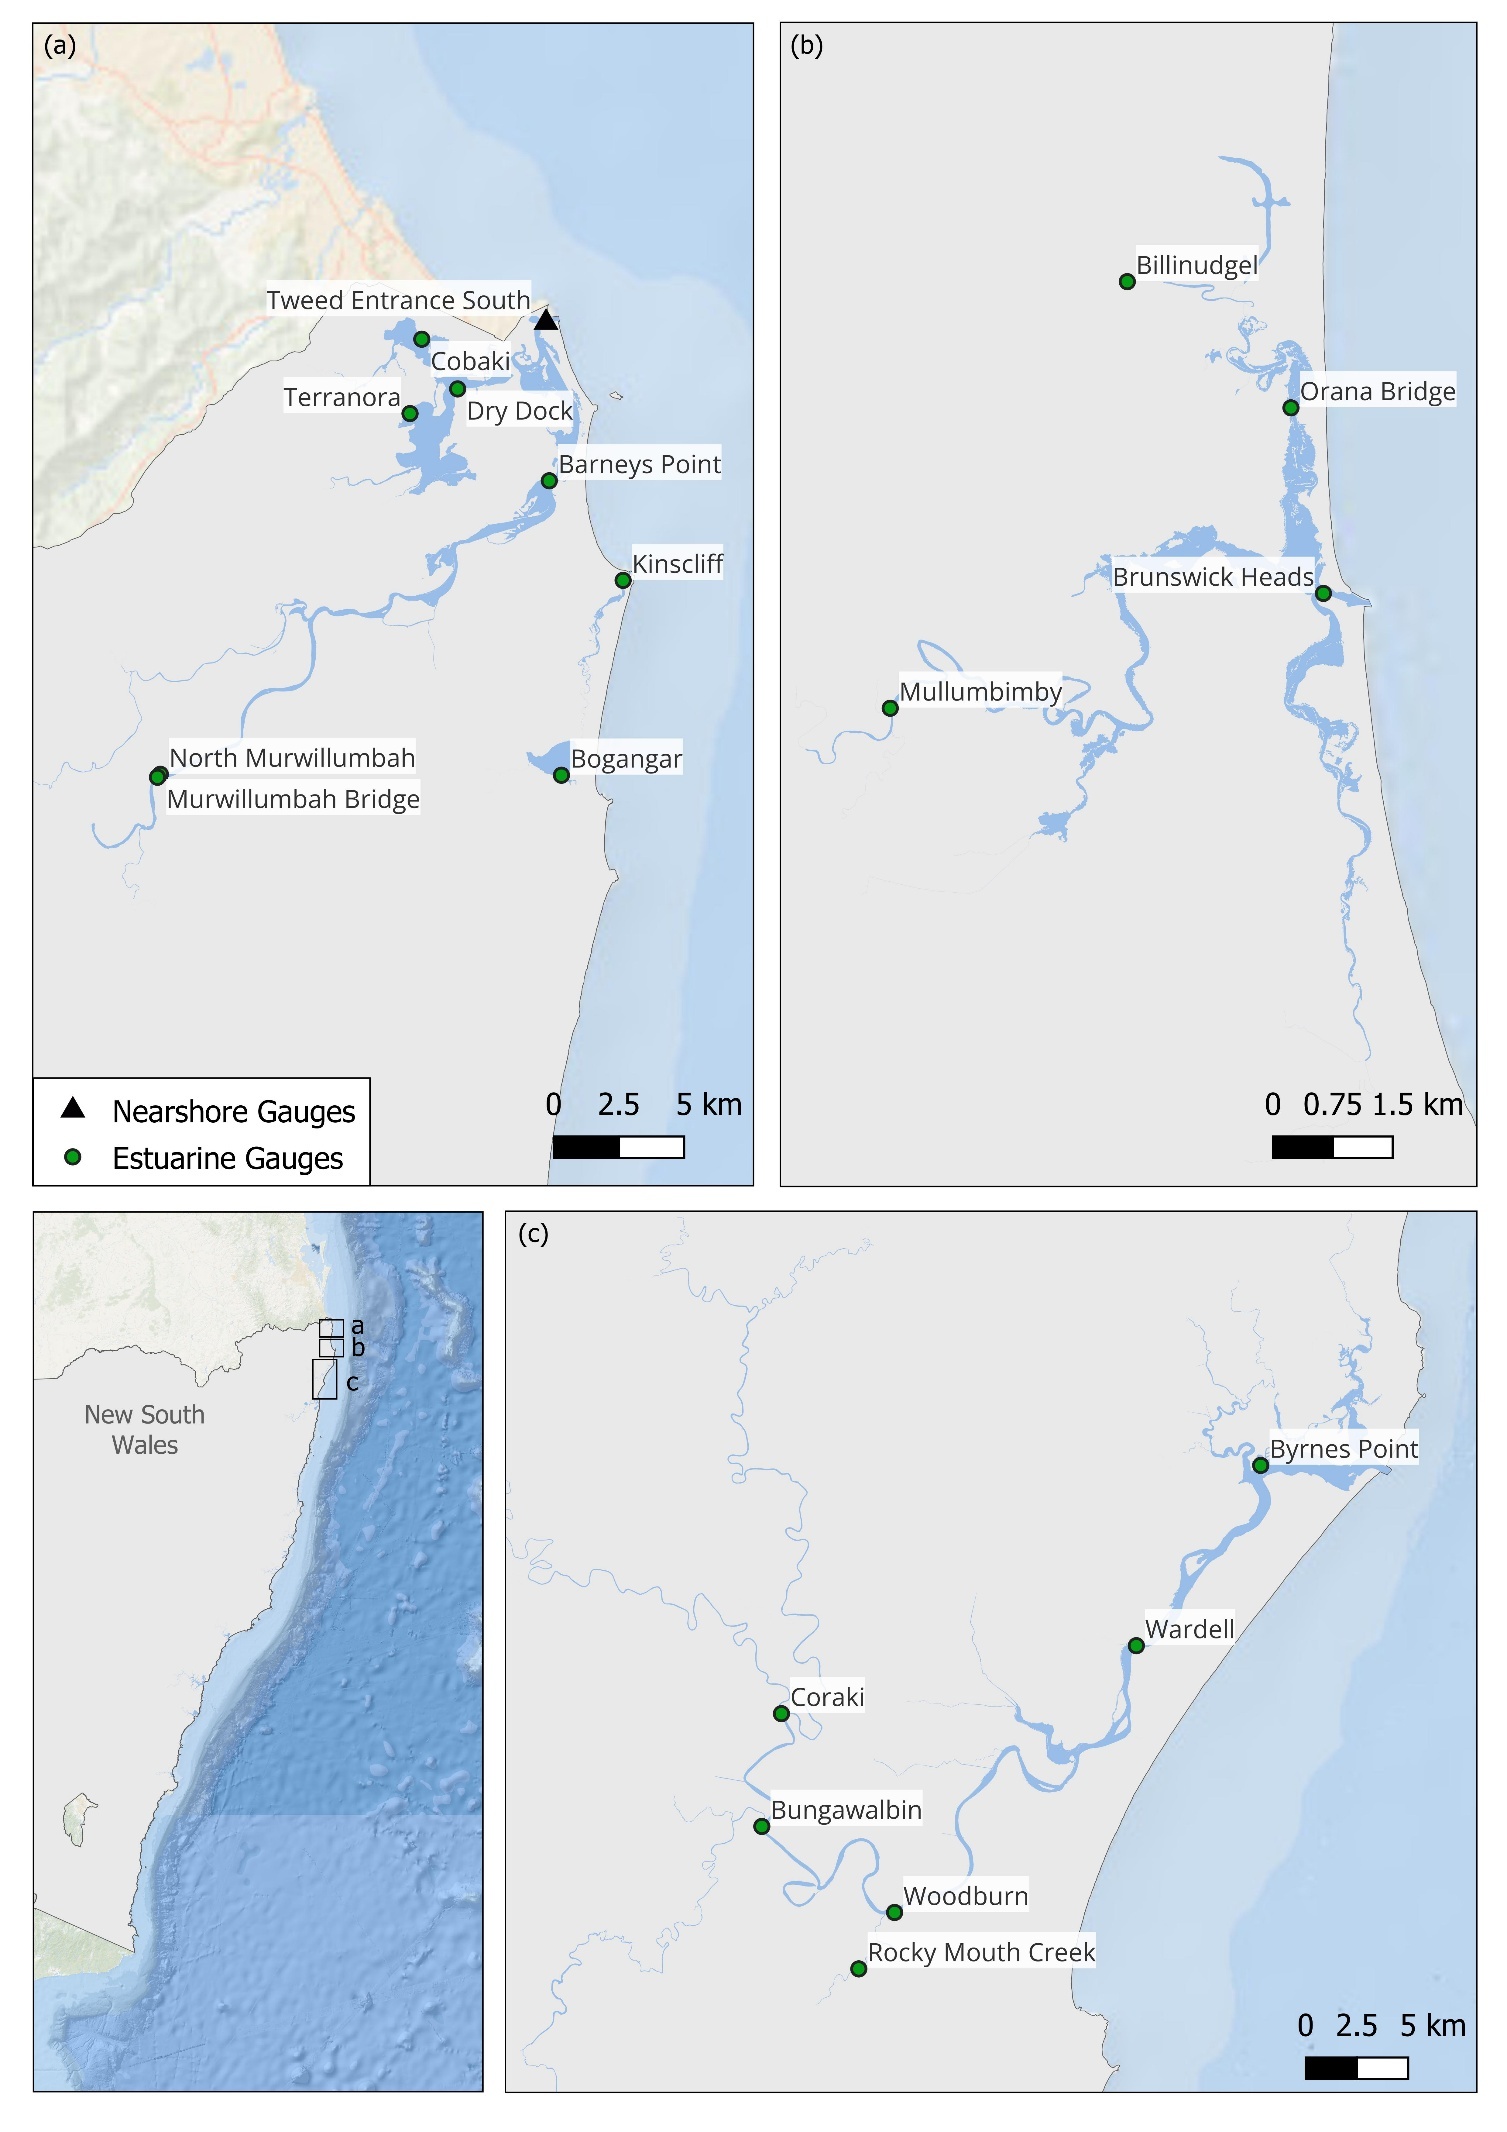


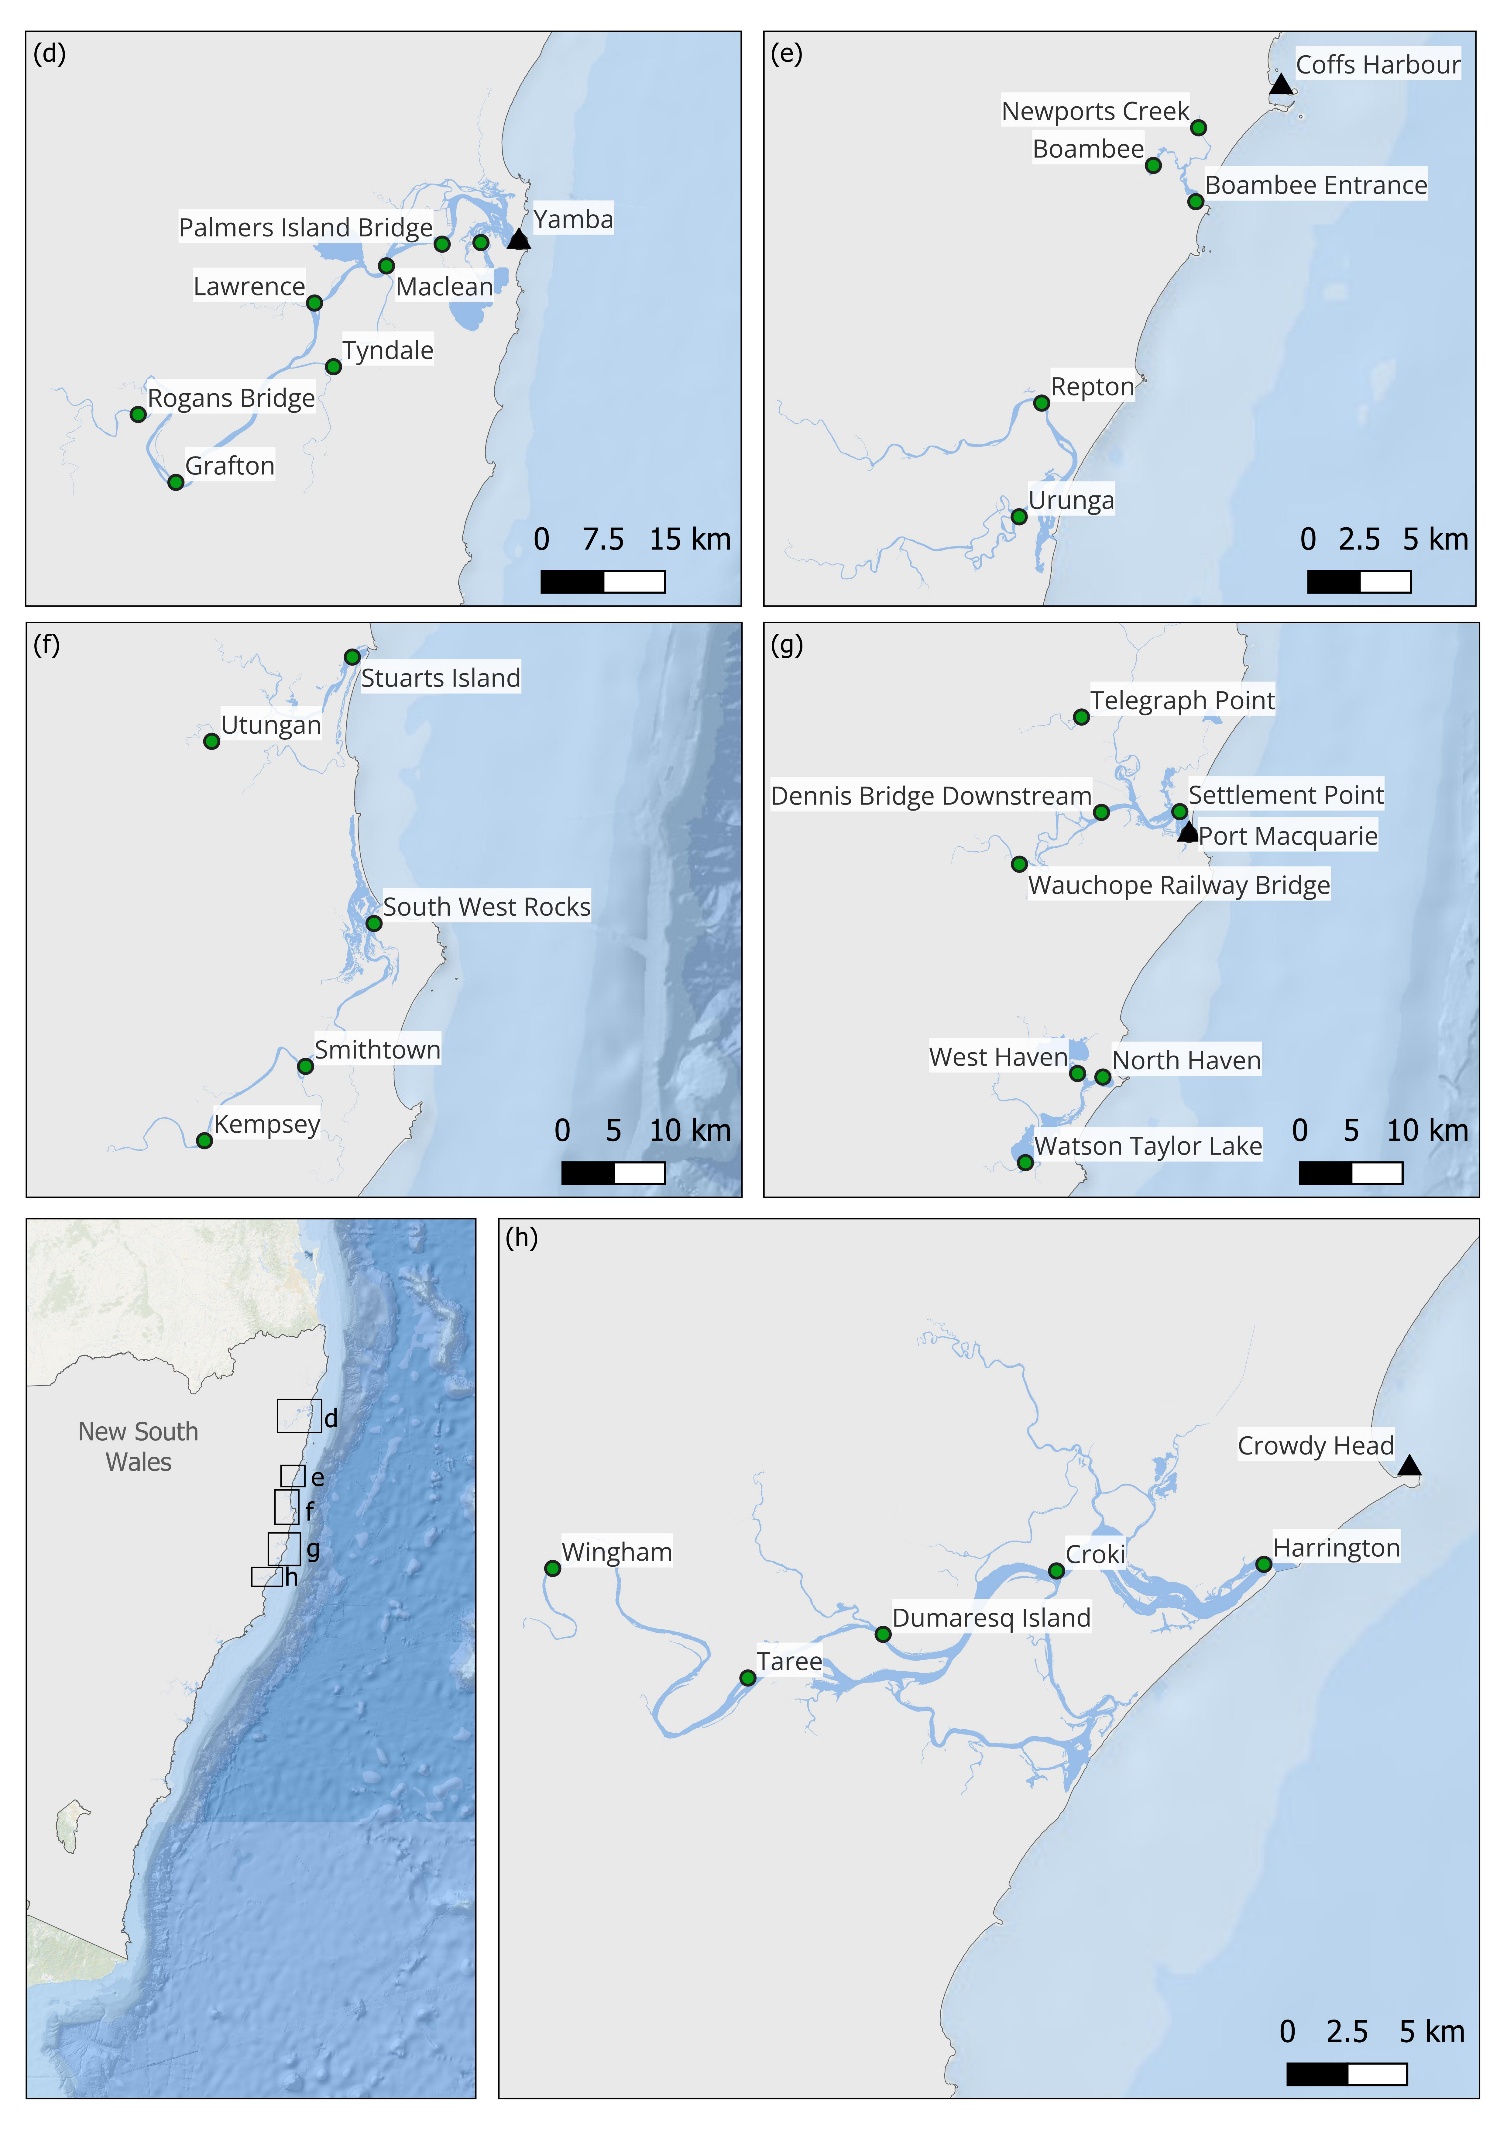


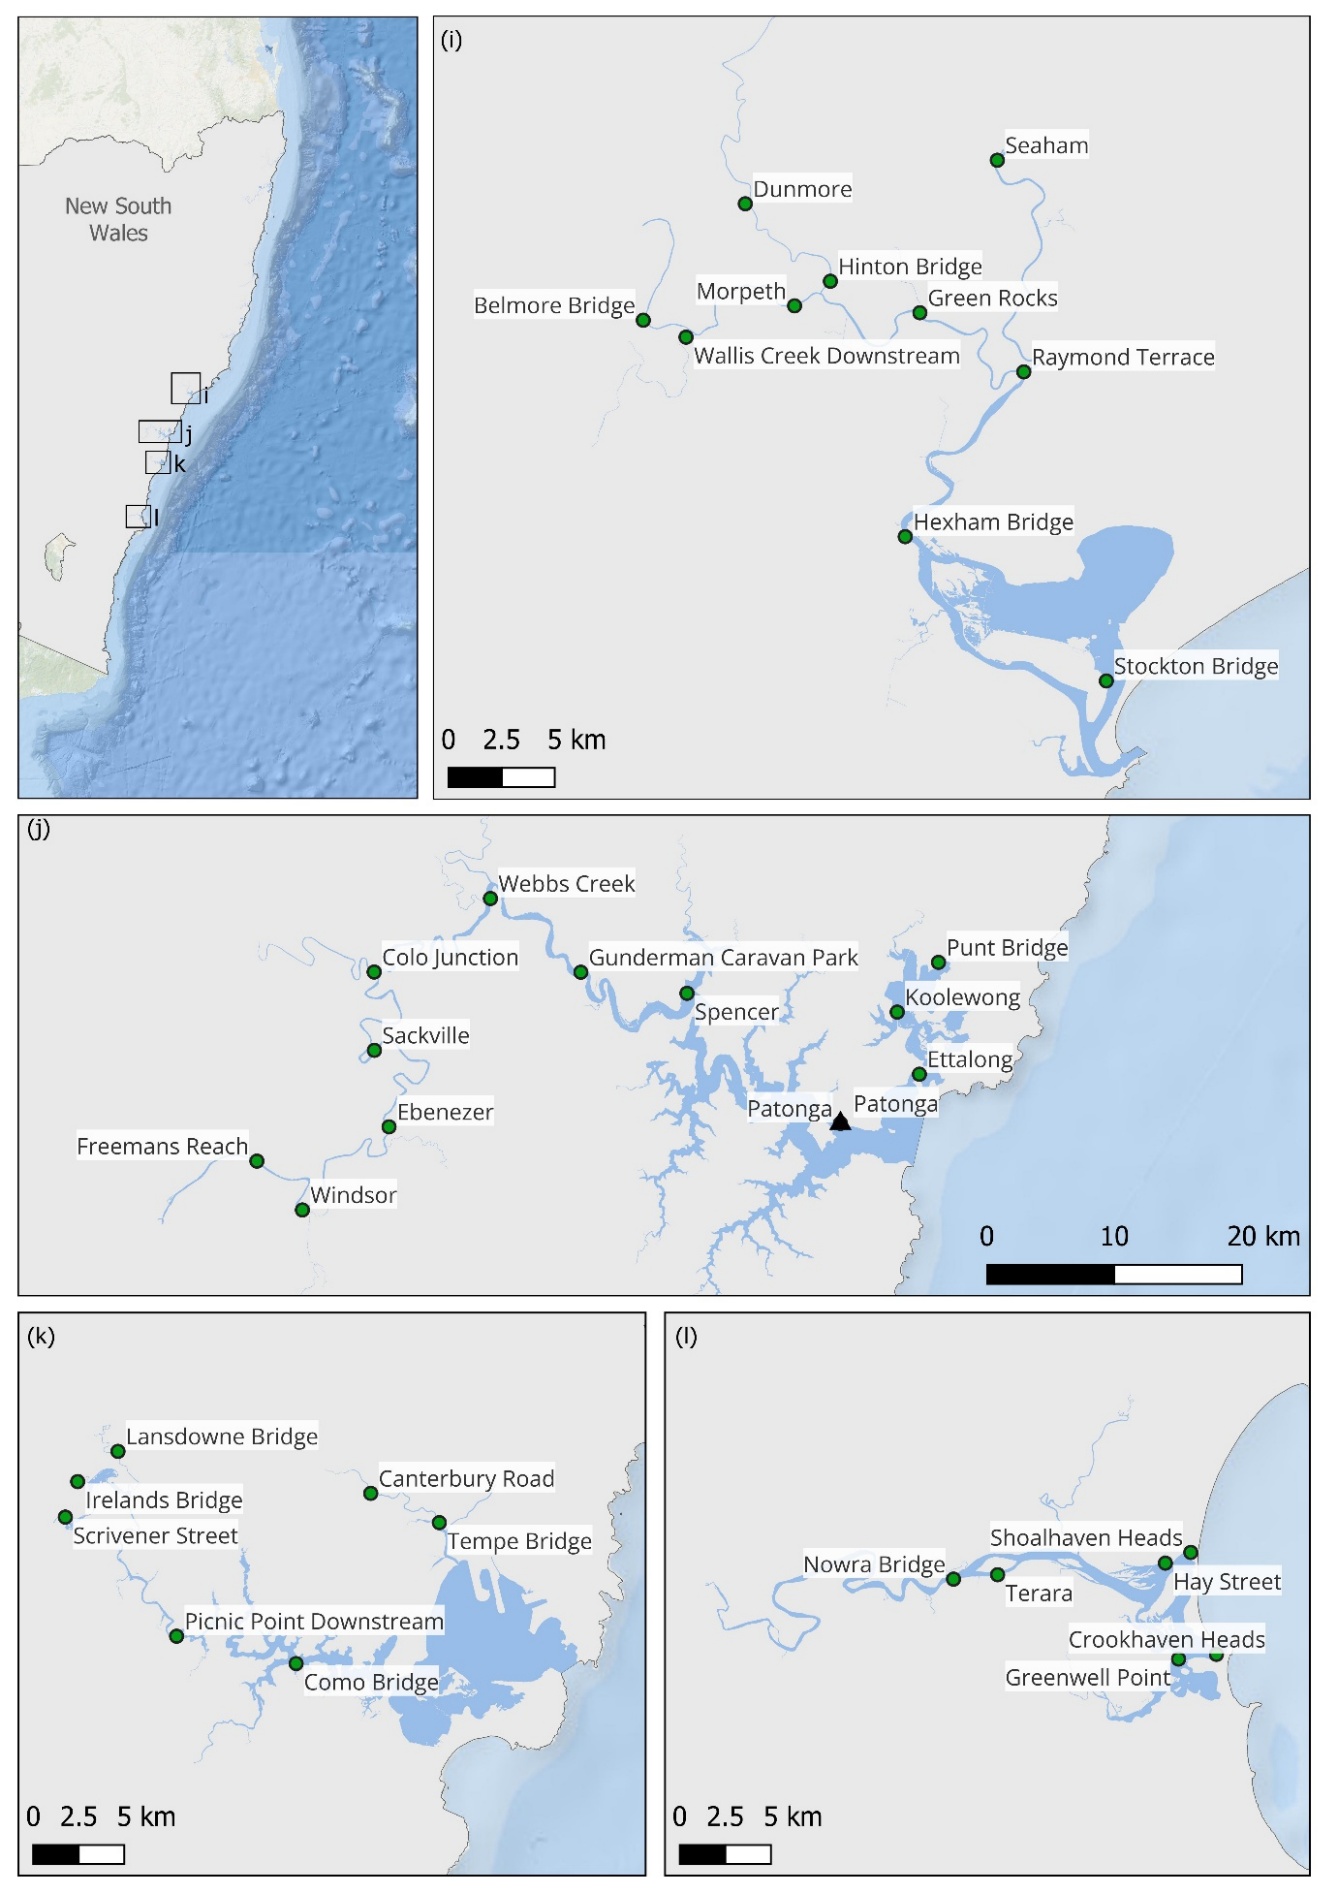


**Figure S2 – Locations of analysed estuaries and nearshore water level gauges along the NSW coastline.**

Maps showing the locations of estuarine and nearshore water level gauges in NSW. An inset map is provided on each map showing the location of estuaries relative to the NSW coastline. Estuaries shown are the Tweed River and Cudgen Creek estuaries (a), Brunswick River estuary (b), Richmond River estuary (c), Clarence River estuary (d), Boambee Creek and Bellinger River estuaries (e), Nambucca River and Macleay River estuaries (f), Hastings River and Camden Haven estuaries (g), Manning River estuary (h), Hunter River estuary (i), Brisbane Water and Hawkesbury River estuaries (j), Botany Bay estuary (k), and Shoalhaven River estuary (l).


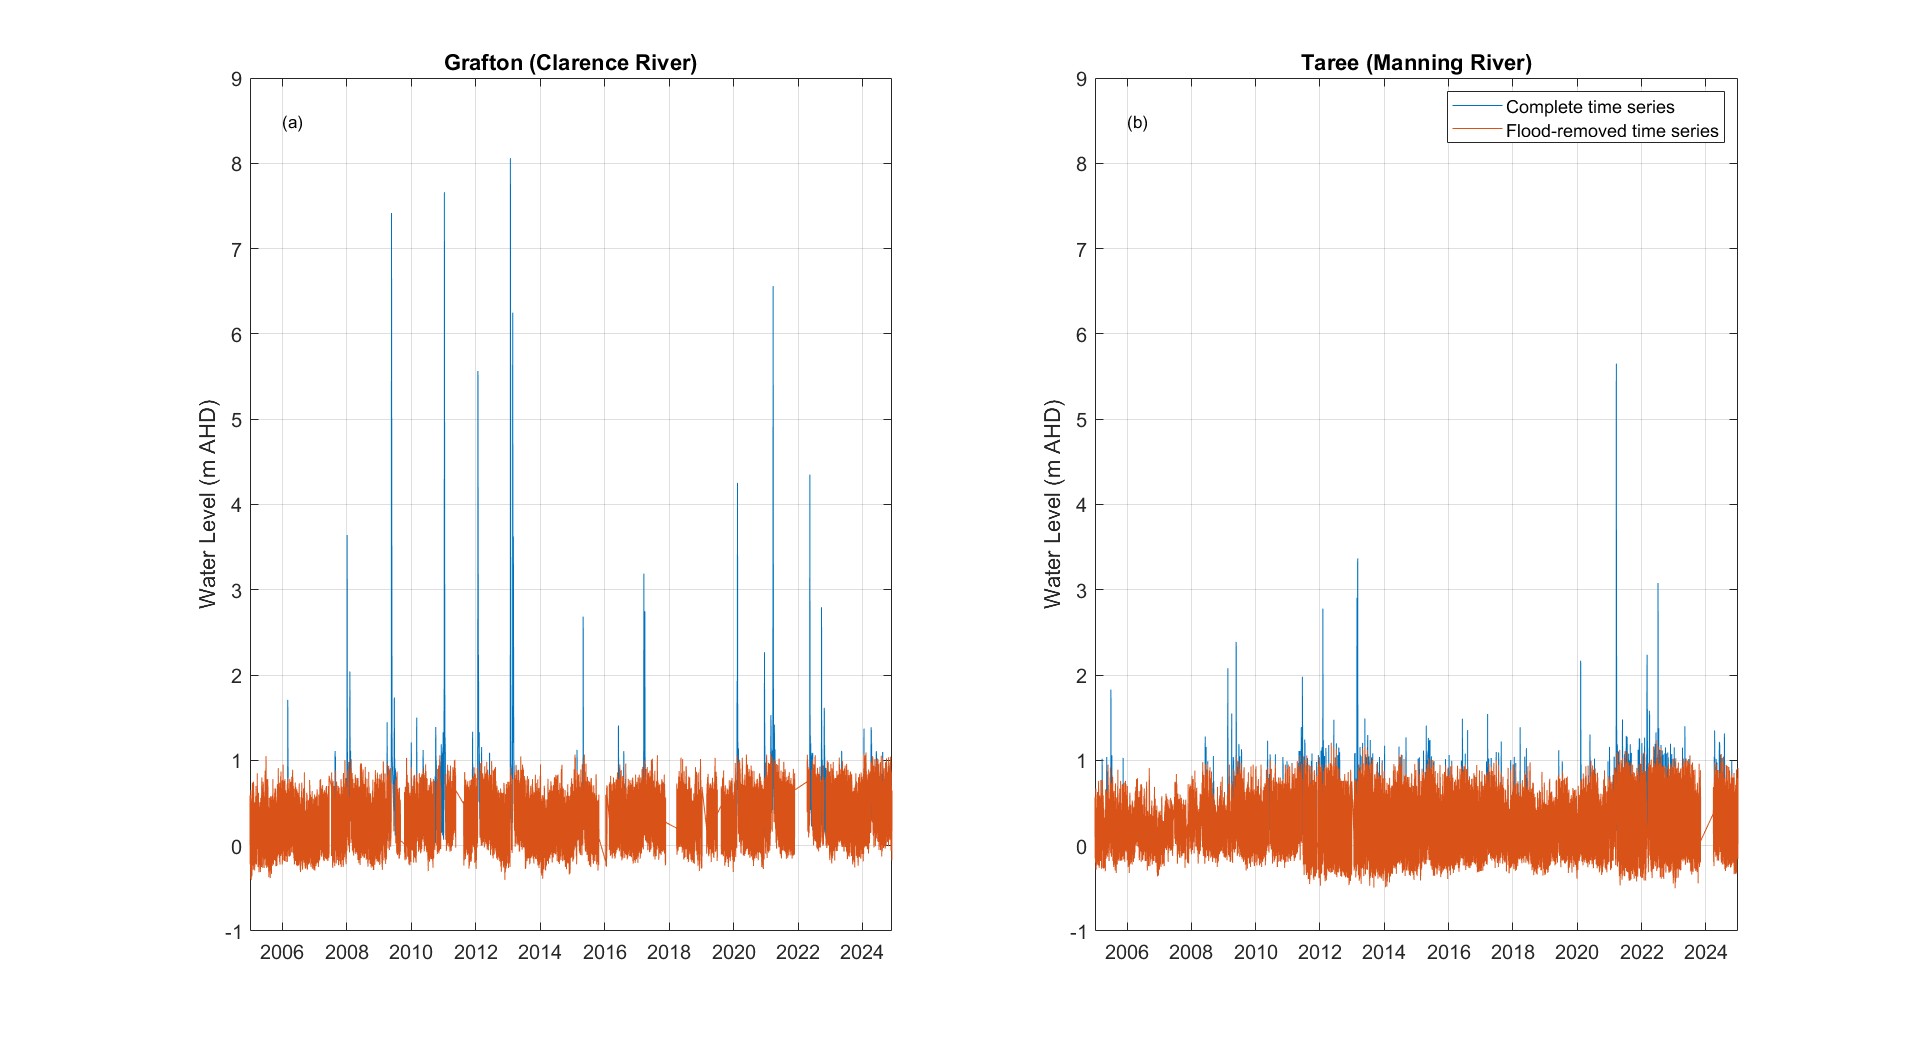


**Figure S3 – Water level time series showing flood events at Grafton (Clarence River estuary) and Taree (Manning River estuary).**

Water level time series from Grafton in the Clarence River estuary (a) and Taree in the Manning River estuary (b), illustrating differences in event magnitudes between the two gauges. The original time series is shown in blue, while the processed series following flood removal (see Methods for details) is shown in orange. Water levels are expressed in metres relative to the Australian Height Datum (AHD).
